# Supplementary material for: Interaction of myo-inositol hexakisphosphate with biogenic and synthetic polyamines
Source: Royal Society of Chemistry journal article supplement (doi:10.1039/c5ob00900f), 2015-01-01
Supplement: c5ob00900f1.pdf [file c5ob00900f1.pdf]

## Electronic Supplementary Information

### Interaction of myo-inositol hexakisphosphate with biogenic and synthetic polyamines†

Julia Torres,<sup>a</sup> Claudia Giorgi,<sup>b</sup> Nicolás Veiga,<sup>a</sup> Carlos Kremer,<sup>\*a</sup> Antonio Bianchi<sup>\*b</sup>

<sup>a</sup>*Cátedra de Química Inorgánica, Departamento Estrella Campos, Facultad de Química, Universidad de la República, Gral. Flores 2124, Montevideo, Uruguay. E-mail: ckremer@fq.edu.uy*

<sup>b</sup>*Department of Chemistry "Ugo Schiff", University of Florence, Sesto Fiorentino, Italy. E-mail: antonio.bianchi@unifi.it*

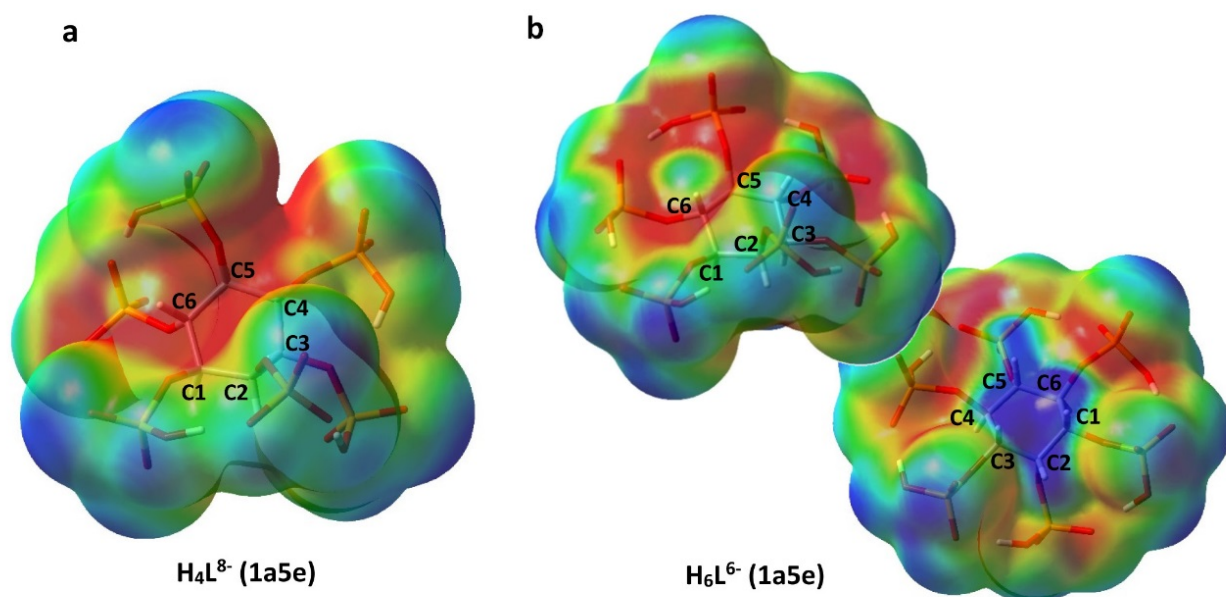

Fig. S1 RHF/3-21+G\* geometries for the 1a5e conformer of two InsP<sub>6</sub> species: H<sub>4</sub>L<sup>8-</sup> (a) and H<sub>6</sub>L<sup>6-</sup> (b), taken from reference <sup>1</sup>. In all cases, the electrostatic potential is mapped on an isodensity surface (isodensity value = 0.0004 e, scale: -0.75 V (red) to -0.65 V (blue) for a, and -0.56 V (red) to -0.51 V (blue) for b). Color code: C (grey), H (white), O (red), P (orange).

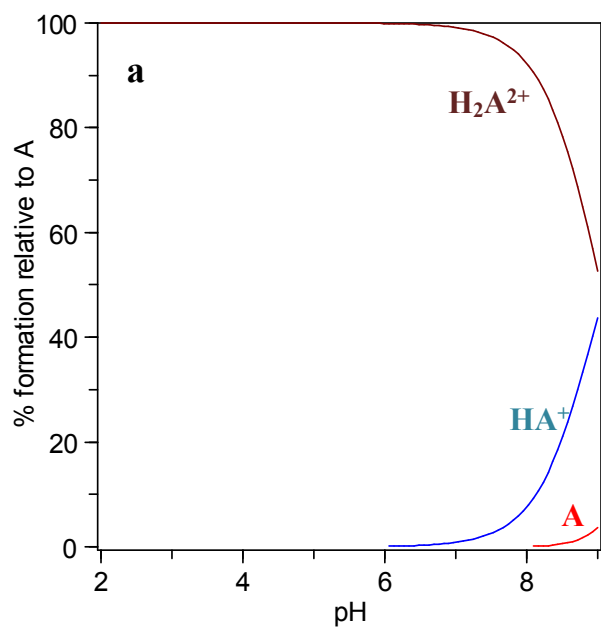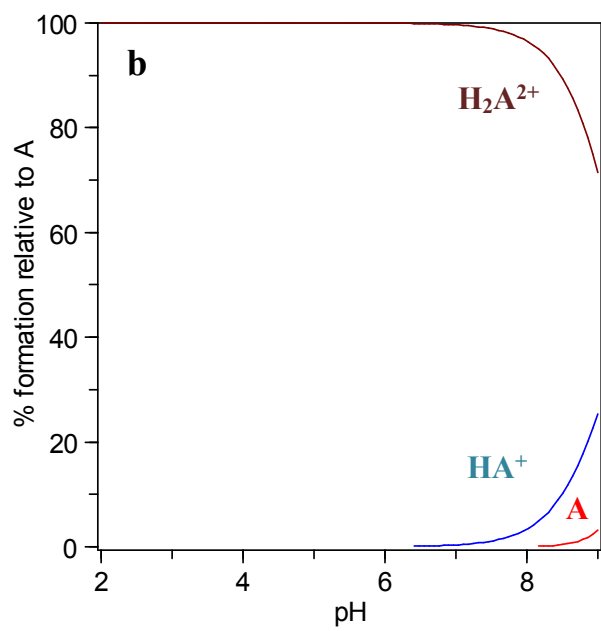

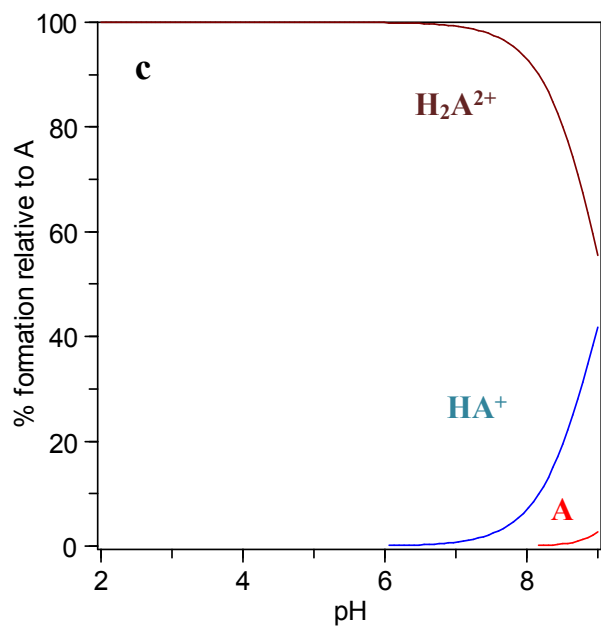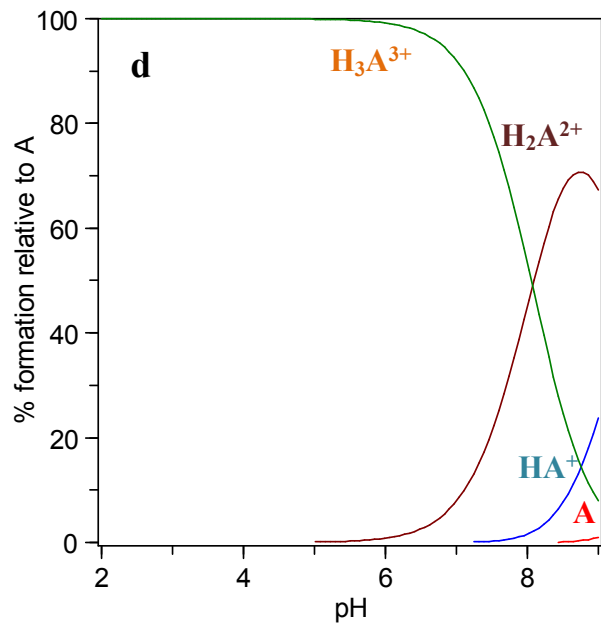



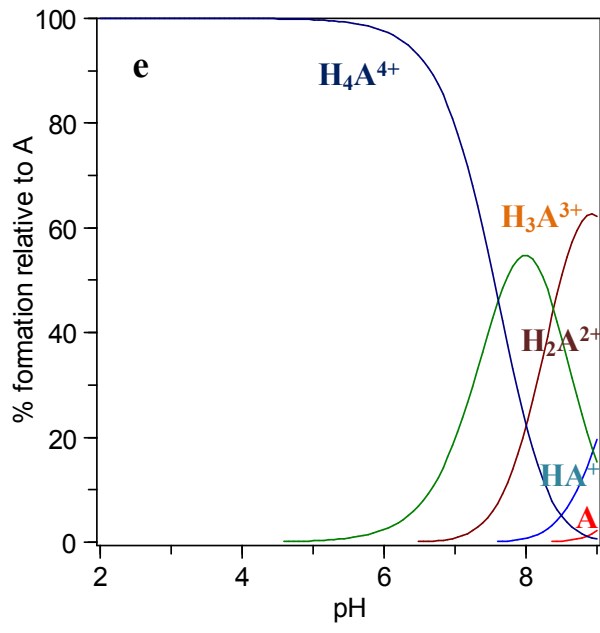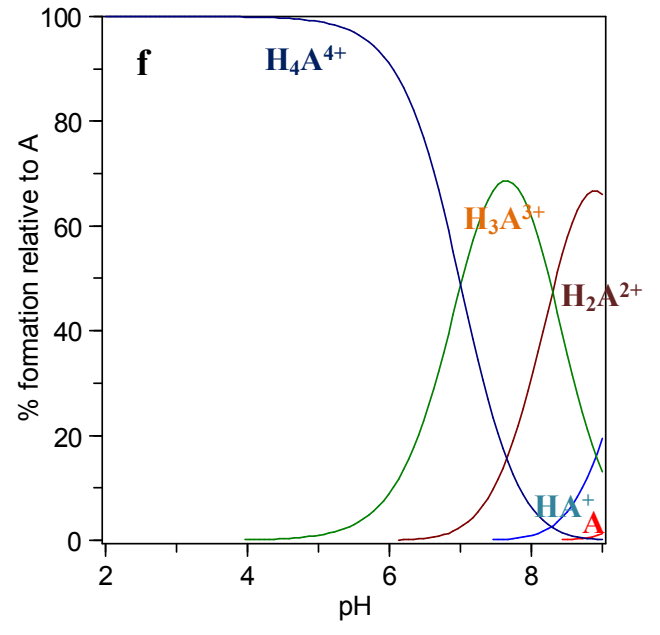

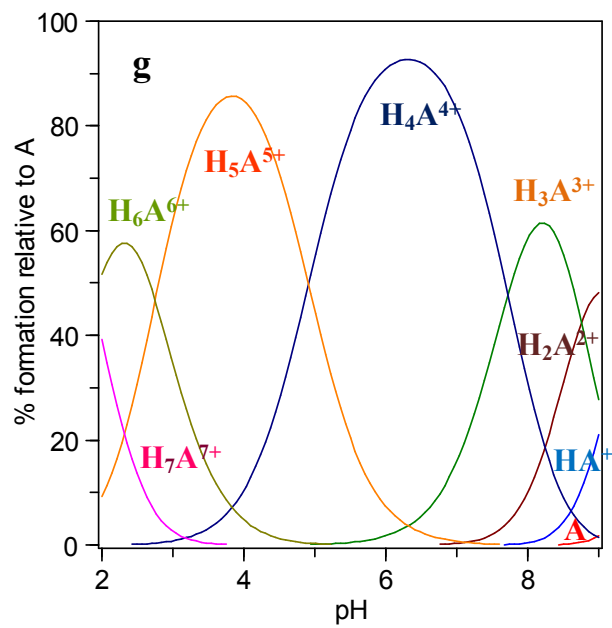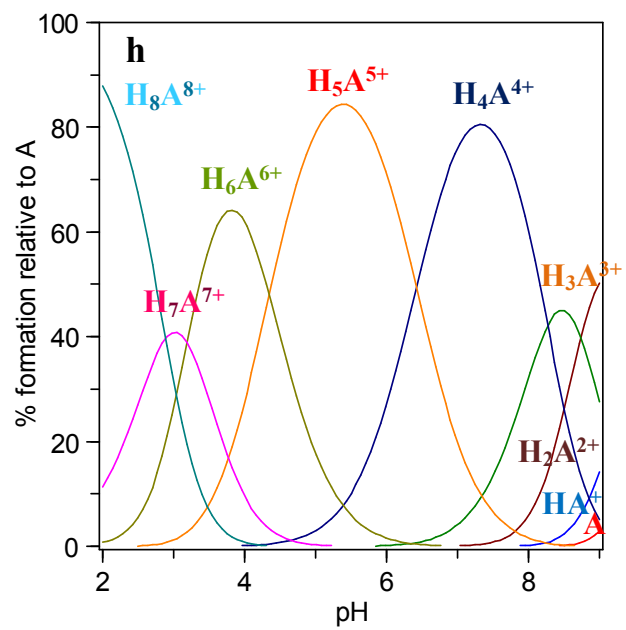



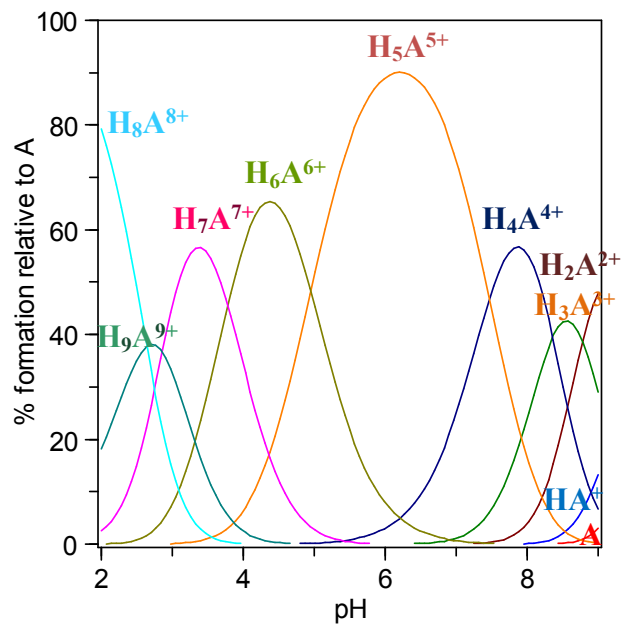

Fig. S2 Speciation of the amines (labelled as A): a) put; b) cad; c) agm; d) spd; e) spm; f) 3,3,3-tet; g) Me<sub>2</sub>hexaen; h) Me<sub>2</sub>heptaen; i) Me<sub>2</sub>octaen.

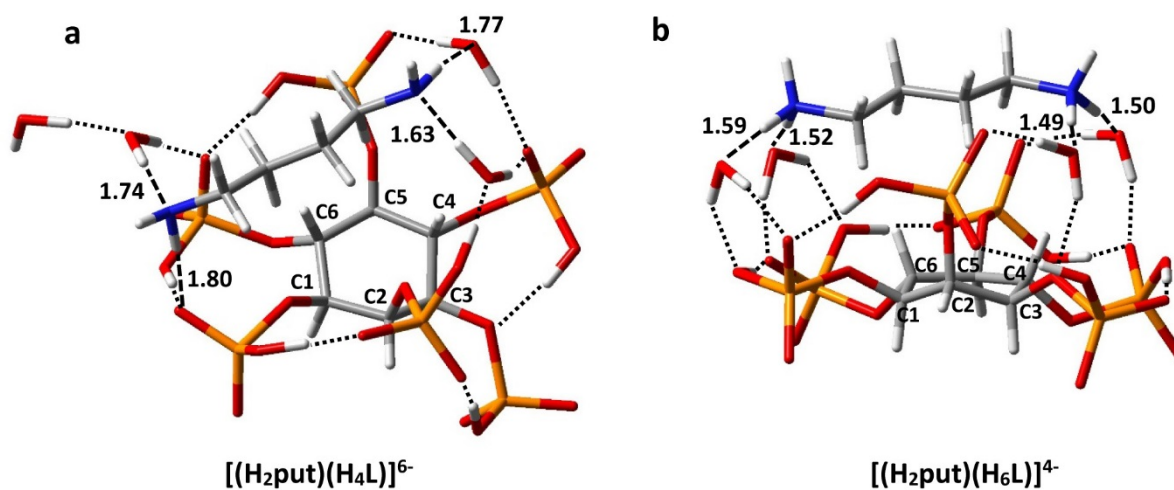

Fig. S3 RB3LYP/LANL2DZ geometries for [(H<sub>2</sub>put)H<sub>4</sub>L]<sup>6-</sup> (a) and [(H<sub>2</sub>put)H<sub>6</sub>L]<sup>4-</sup> (b) species. The O-H···N and O-H···O hydrogen bonds are shown as dashed and dotted lines, respectively, with the associated distances for the former in Å. Color code: C (grey), H (white), O (red), P (orange), N (blue).



Table S1 Relative formation constants of 1:1 complexes of  $\text{InsP}_6$  ( $\text{L}^{12-}$ ) with polyamines (A) calculated from Tables 1 and 2.

|                                                                                                                 | put     | cad     | agm     | spd     | spm     | 3,3,3-tet | Me <sub>2</sub> hexaen | Me <sub>2</sub> heptaen | Me <sub>2</sub> octaen |
|-----------------------------------------------------------------------------------------------------------------|---------|---------|---------|---------|---------|-----------|------------------------|-------------------------|------------------------|
| $\text{HA}^+ + \text{H}_3\text{L}^{9-} \rightarrow [(\text{HA})(\text{H}_3\text{L})]^{8-}$                      | 3.50(4) | 3.90(6) | 3.16(6) | 2.7(3)  | 4.43(6) |           |                        |                         |                        |
| $\text{H}_2\text{A}^{2+} + \text{H}_3\text{L}^{9-} \rightarrow [(\text{H}_2\text{A})(\text{H}_3\text{L})]^{7-}$ | 4.39(4) | 4.43(5) | 3.7(2)  | 4.28(4) | 5.30(1) | 4.66(5)   | 4.0(2)                 | 5.0(1)                  | 5.6(1)                 |
| $\text{H}_2\text{A}^{2+} + \text{H}_4\text{L}^{8-} \rightarrow [(\text{H}_2\text{A})(\text{H}_4\text{L})]^{6-}$ | 4.02(6) | 3.8(1)  | 3.6(1)  | 5.04(6) | 6.43(6) | 5.84(5)   | 5.86(6)                | 6.61(6)                 | 7.12(7)                |
| $\text{H}_2\text{A}^{2+} + \text{H}_5\text{L}^{7-} \rightarrow [(\text{H}_2\text{A})(\text{H}_5\text{L})]^{5-}$ | 3.72(8) | 3.6(1)  | 4.5(1)  |         |         |           |                        |                         |                        |
| $\text{H}_3\text{A}^{3+} + \text{H}_4\text{L}^{8-} \rightarrow [(\text{H}_3\text{A})(\text{H}_4\text{L})]^{5-}$ |         |         |         | 4.78(6) | 7.03(5) | 6.90(5)   | 6.34(7)                | 7.38(7)                 | 8.18(7)                |
| $\text{H}_3\text{A}^{3+} + \text{H}_5\text{L}^{7-} \rightarrow [(\text{H}_3\text{A})(\text{H}_5\text{L})]^{4-}$ |         |         |         | 3.78(9) |         |           |                        |                         |                        |
| $\text{H}_4\text{A}^{4+} + \text{H}_4\text{L}^{8-} \rightarrow [(\text{H}_4\text{A})(\text{H}_4\text{L})]^{4-}$ |         |         |         |         | 6.75(6) | 7.48(6)   | 5.88(8)                | 6.86(8)                 | 7.90(7)                |
| $\text{H}_4\text{A}^{4+} + \text{H}_5\text{L}^{7-} \rightarrow [(\text{H}_4\text{A})(\text{H}_5\text{L})]^{3-}$ |         |         |         |         | 5.42(6) | 6.10(6)   | 5.07(7)                | 6.39(8)                 |                        |
| $\text{H}_4\text{A}^{4+} + \text{H}_6\text{L}^{6-} \rightarrow [(\text{H}_4\text{A})(\text{H}_6\text{L})]^{2-}$ |         |         |         |         | 3.85(7) | 4.60(8)   | 4.0(1)                 |                         |                        |
| $\text{H}_5\text{A}^{5+} + \text{H}_4\text{L}^{8-} \rightarrow [(\text{H}_5\text{A})(\text{H}_4\text{L})]^{3-}$ |         |         |         |         |         |           |                        |                         | 7.15(7)                |
| $\text{H}_5\text{A}^{5+} + \text{H}_5\text{L}^{7-} \rightarrow [(\text{H}_5\text{A})(\text{H}_5\text{L})]^{2-}$ |         |         |         |         |         |           |                        | 5.1(1)                  | 5.73(8)                |
| $\text{H}_5\text{A}^{5+} + \text{H}_6\text{L}^{6-} \rightarrow [(\text{H}_5\text{A})(\text{H}_6\text{L})]^{-}$  |         |         |         |         |         |           | 3.90(8)                | 4.3(1)                  | 5.06(7)                |

Table S2 Structural parameters for some of the 1:1 and 2:1 amine- $\text{InsP}_6$  species.

| Species                                               | Hydrogen bond mean distance                 |       | Number of hydrogen bonds |       |
|-------------------------------------------------------|---------------------------------------------|-------|--------------------------|-------|
|                                                       | $d_{\text{H}\cdots\text{O}} (\text{\AA})^a$ |       | $n^a$                    |       |
|                                                       | A = N                                       | A = O | A = N                    | A = O |
| $[(\text{H}_2\text{put})(\text{H}_4\text{L})]^{6-}$   | 1.73                                        | 1.57  | 4                        | 11    |
| $[(\text{H}_2\text{cad})(\text{H}_4\text{L})]^{6-}$   | 1.80                                        | 1.63  | 5                        | 12    |
| $[(\text{H}_2\text{agm})(\text{H}_4\text{L})]^{6-}$   | 2.03                                        | 1.63  | 7                        | 13    |
| $[(\text{H}_3\text{spd})(\text{H}_4\text{L})]^{5-}$   | 1.96                                        | 1.72  | 4                        | 15    |
| $[(\text{H}_2\text{put})_2(\text{H}_6\text{L})]^{2-}$ | 1.54                                        | 1.70  | 8                        | 20    |
| $[(\text{H}_2\text{cad})_2(\text{H}_6\text{L})]^{2-}$ | 1.53                                        | 1.66  | 8                        | 20    |
| $[(\text{H}_2\text{agm})_2(\text{H}_6\text{L})]^{2-}$ | 1.82                                        | 1.62  | 11                       | 21    |

a)  $d_{\text{H}\cdots\text{O}}$  and  $n$  represent the average distance (proton-acceptor) and number of  $\text{A-H}\cdots\text{O}$  hydrogen bonds, respectively, with  $\text{A} = \text{N}$  or  $\text{O}$ .

Table S3 Protonation data of polyamines (A) at 310.1 ± 0.1 K in 0.15 M Me<sub>4</sub>NCl.

|                              |                                                                                  | log <i>K</i> | Δ <i>G</i> <sup>o</sup> (kJ/mol) | Δ <i>H</i> <sup>o</sup> (kJ/mol) | <i>T</i> Δ <i>S</i> <sup>o</sup> (kJ/mol) |
|------------------------------|----------------------------------------------------------------------------------|--------------|----------------------------------|----------------------------------|-------------------------------------------|
| <b>put</b>                   | A + H <sup>+</sup> → HA <sup>+</sup>                                             | 10.076(3)    | -59.80(2)                        | -57.10(5)                        | 2.70(5)                                   |
|                              | HA <sup>+</sup> + H <sup>+</sup> → H <sub>2</sub> A <sup>2+</sup>                | 9.080(7)     | -53.89(4)                        | -57.81(5)                        | -3.92(6)                                  |
| <b>cad</b>                   | A + H <sup>+</sup> → HA <sup>+</sup>                                             | 9.90(1)      | -58.76(6)                        | -56.53(3)                        | 2.23(7)                                   |
|                              | HA <sup>+</sup> + H <sup>+</sup> → H <sub>2</sub> A <sup>2+</sup>                | 9.45(2)      | -56.1(6)                         | -56.10(6)                        | 0.0(6)                                    |
| <b>agm</b>                   | A + H <sup>+</sup> → HA <sup>+</sup>                                             | 10.179(7)    | -60.42(4)                        | -54.73(5)                        | 5.69(6)                                   |
|                              | HA <sup>+</sup> + H <sup>+</sup> → H <sub>2</sub> A <sup>2+</sup>                | 9.14(7)      | -54.3(4)                         | -55.04(5)                        | -0.7(4)                                   |
| <b>spd</b>                   | A + H <sup>+</sup> → HA <sup>+</sup>                                             | 10.369(8)    | -61.54(5)                        | -50.88(2)                        | 10.66(5)                                  |
|                              | HA <sup>+</sup> + H <sup>+</sup> → H <sub>2</sub> A <sup>2+</sup>                | 9.45(1)      | -56.09(6)                        | -55.14(4)                        | 0.95(7)                                   |
|                              | H <sub>2</sub> A <sup>2+</sup> + H <sup>+</sup> → H <sub>3</sub> A <sup>3+</sup> | 8.07(3)      | -47.9(2)                         | -49.04(4)                        | -1.14(2)                                  |
| <b>spm</b>                   | A + H <sup>+</sup> → HA <sup>+</sup>                                             | 9.95(1)      | -59.06(6)                        | -51.06(6)                        | 8.00(8)                                   |
|                              | HA <sup>+</sup> + H <sup>+</sup> → H <sub>2</sub> A <sup>2+</sup>                | 9.50(2)      | -56.4(1)                         | -52.15(5)                        | 4.3(1)                                    |
|                              | H <sub>2</sub> A <sup>2+</sup> + H <sup>+</sup> → H <sub>3</sub> A <sup>3+</sup> | 8.39(2)      | -49.8(1)                         | -51.33(6)                        | -1.5(1)                                   |
|                              | H <sub>3</sub> A <sup>3+</sup> + H <sup>+</sup> → H <sub>4</sub> A <sup>4+</sup> | 7.61(4)      | -45.2(2)                         | -48.63(6)                        | -3.4(2)                                   |
| <b>3,3,3-tet</b>             | A + H <sup>+</sup> → HA <sup>+</sup>                                             | 10.157(4)    | -60.29(2)                        | -52.4(1)                         | 7.9(1)                                    |
|                              | HA <sup>+</sup> + H <sup>+</sup> → H <sub>2</sub> A <sup>2+</sup>                | 9.532(7)     | -56.58(4)                        | -54.4(1)                         | 2.2(1)                                    |
|                              | H <sub>2</sub> A <sup>2+</sup> + H <sup>+</sup> → H <sub>3</sub> A <sup>3+</sup> | 8.30(1)      | -49.26(6)                        | -54.0(1)                         | -4.7(1)                                   |
|                              | H <sub>3</sub> A <sup>3+</sup> + H <sup>+</sup> → H <sub>4</sub> A <sup>4+</sup> | 7.01(2)      | -41.6(1)                         | -50.3(1)                         | -8.7(1)                                   |
| <b>Me<sub>2</sub>hexaen</b>  | A + H <sup>+</sup> → HA <sup>+</sup>                                             | 10.09(1)     | -59.89(6)                        | -36.17(6)                        | 23.72(8)                                  |
|                              | HA <sup>+</sup> + H <sup>+</sup> → H <sub>2</sub> A <sup>2+</sup>                | 9.36(3)      | -55.6(2)                         | -43.25(5)                        | 12.4(2)                                   |
|                              | H <sub>2</sub> A <sup>2+</sup> + H <sup>+</sup> → H <sub>3</sub> A <sup>3+</sup> | 8.76(5)      | -52.0(3)                         | -41.90(5)                        | 10.1(3)                                   |
|                              | H <sub>3</sub> A <sup>3+</sup> + H <sup>+</sup> → H <sub>4</sub> A <sup>4+</sup> | 7.72(8)      | -45.8(5)                         | -42.87(5)                        | 2.9(5)                                    |
|                              | H <sub>4</sub> A <sup>4+</sup> + H <sup>+</sup> → H <sub>5</sub> A <sup>5+</sup> | 4.6(1)       | -27.3(6)                         | -36.11(5)                        | -8.8(6)                                   |
|                              | H <sub>5</sub> A <sup>5+</sup> + H <sup>+</sup> → H <sub>6</sub> A <sup>6+</sup> | 3.1 (2)      | -18(1)                           | -31.67(6)                        | -14(1)                                    |
| <b>Me<sub>2</sub>heptaen</b> | H <sub>6</sub> A <sup>6+</sup> + H <sup>+</sup> → H <sub>7</sub> A <sup>7+</sup> | 2.2(2)       | -13(1)                           | -25.79(7)                        | -13(1)                                    |
|                              | A + H <sup>+</sup> → HA <sup>+</sup>                                             | 9.69(2)      | -57.5(1)                         | -36.22(6)                        | 21.3(1)                                   |
|                              | HA <sup>+</sup> + H <sup>+</sup> → H <sub>2</sub> A <sup>2+</sup>                | 9.55(4)      | -56.7(2)                         | -43.75(5)                        | 13.0(2)                                   |
|                              | H <sub>2</sub> A <sup>2+</sup> + H <sup>+</sup> → H <sub>3</sub> A <sup>3+</sup> | 8.74(6)      | -51.9(2)                         | -38.76(5)                        | 13.1(3)                                   |
|                              | H <sub>3</sub> A <sup>3+</sup> + H <sup>+</sup> → H <sub>4</sub> A <sup>4+</sup> | 8.3(1)       | -49.3(6)                         | -42.77(5)                        | 6.5(6)                                    |
|                              | H <sub>4</sub> A <sup>4+</sup> + H <sup>+</sup> → H <sub>5</sub> A <sup>5+</sup> | 6.4(2)       | -38(1)                           | -35.82(5)                        | 2(1)                                      |
|                              | H <sub>5</sub> A <sup>5+</sup> + H <sup>+</sup> → H <sub>6</sub> A <sup>6+</sup> | 4.4(3)       | -26(2)                           | -28.66(5)                        | -3(2)                                     |
|                              | H <sub>6</sub> A <sup>6+</sup> + H <sup>+</sup> → H <sub>7</sub> A <sup>7+</sup> | 3.2(3)       | -19(2)                           | -31.85(6)                        | -13(2)                                    |
| <b>Me<sub>2</sub>octaen</b>  | H <sub>7</sub> A <sup>7+</sup> + H <sup>+</sup> → H <sub>8</sub> A <sup>8+</sup> | 2.9(4)       | -17(2)                           | -26.3(1)                         | -9(2)                                     |
|                              | A + H <sup>+</sup> → HA <sup>+</sup>                                             | 9.65(2)      | -57.3(1)                         | -42.92(6)                        | 14.4(6)                                   |
|                              | HA <sup>+</sup> + H <sup>+</sup> → H <sub>2</sub> A <sup>2+</sup>                | 9.56(3)      | -56.7(2)                         | -44.4(1)                         | 12.3(2)                                   |
|                              | H <sub>2</sub> A <sup>2+</sup> + H <sup>+</sup> → H <sub>3</sub> A <sup>3+</sup> | 8.78(4)      | -52.1(2)                         | -44.40(9)                        | 7.7(2)                                    |
|                              | H <sub>3</sub> A <sup>3+</sup> + H <sup>+</sup> → H <sub>4</sub> A <sup>4+</sup> | 8.36(6)      | -49.6(4)                         | -47.35(8)                        | 2.3(4)                                    |
|                              | H <sub>4</sub> A <sup>4+</sup> + H <sup>+</sup> → H <sub>5</sub> A <sup>5+</sup> | 7.47(8)      | -44.3(5)                         | -45.30(8)                        | -1.0(5)                                   |
|                              | H <sub>5</sub> A <sup>5+</sup> + H <sup>+</sup> → H <sub>6</sub> A <sup>6+</sup> | 5.0(1)       | -29.7(6)                         | -37.00(9)                        | -7.3(6)                                   |
|                              | H <sub>6</sub> A <sup>6+</sup> + H <sup>+</sup> → H <sub>7</sub> A <sup>7+</sup> | 3.8(2)       | -23(1)                           | -37.1(1)                         | -14(1)                                    |
|                              | H <sub>7</sub> A <sup>7+</sup> + H <sup>+</sup> → H <sub>8</sub> A <sup>8+</sup> | 2.9(2)       | -17(1)                           | -32.5(1)                         | -16(1)                                    |
|                              | H <sub>8</sub> A <sup>8+</sup> + H <sup>+</sup> → H <sub>9</sub> A <sup>9+</sup> | 2.6(3)       | -15(2)                           | -27.2(2)                         | -12(2)                                    |

<sup>a</sup> Values in parentheses are standard deviation on the last significant figures.

Table S4 Thermodynamic data for the formation of InsP<sub>6</sub> (L<sup>12-</sup>) complexes with cadaverine (A). 0.10 M Me<sub>4</sub>NCl, 37.0 ± 0.1 °C.

| Equilibrium                                                                                                            | log <i>K</i>         | Δ <i>G</i> <sup>o</sup> (kJ/mol) | Δ <i>H</i> <sup>o</sup> (kJ/mol) | <i>T</i> Δ <i>S</i> <sup>o</sup> (kJ/mol) |
|------------------------------------------------------------------------------------------------------------------------|----------------------|----------------------------------|----------------------------------|-------------------------------------------|
| HA <sup>+</sup> + H <sub>3</sub> L <sup>9-</sup> → [(HA)(H <sub>3</sub> L)] <sup>8-</sup>                              | 3.90(6) <sup>a</sup> | -23.1(4)                         | -25.1(6)                         | -2.0(7)                                   |
| H <sub>2</sub> A <sup>2+</sup> + H <sub>3</sub> L <sup>9-</sup> → [(H <sub>2</sub> A)(H <sub>3</sub> L)] <sup>7-</sup> | 4.43(3)              | -26.3(2)                         | 77.8(5)                          | 104.1(5)                                  |
| H <sub>2</sub> A <sup>2+</sup> + H <sub>4</sub> L <sup>8-</sup> → [(H <sub>2</sub> A)(H <sub>4</sub> L)] <sup>6-</sup> | 3.8(1)               | -22.6(6)                         | 79.8(5)                          | 102.4(8)                                  |
| H <sub>2</sub> A <sup>2+</sup> + H <sub>5</sub> L <sup>7-</sup> → [(H <sub>2</sub> A)(H <sub>5</sub> L)] <sup>5-</sup> | 3.65(1)              | -21.66(6)                        | 89.0(5)                          | 110.7(5)                                  |

<sup>a</sup> Values in parentheses are standard deviation on the last significant figures

Table S5 Thermodynamic data for the formation of  $\text{InsP}_6$  ( $\text{L}^{12-}$ ) complexes with agmatine (A). 0.10 M  $\text{Me}_4\text{NCl}$ ,  $37.0 \pm 0.1$  °C.

| Equilibrium                                                                                                     | $\log K$             | $\Delta G^\circ$ (kJ/mol) | $\Delta H^\circ$ (kJ/mol) | $T\Delta S^\circ$ (kJ/mol) |
|-----------------------------------------------------------------------------------------------------------------|----------------------|---------------------------|---------------------------|----------------------------|
| $\text{HA}^+ + \text{H}_3\text{L}^{9-} \rightarrow [(\text{HA})(\text{H}_3\text{L})]^{8-}$                      | 3.16(6) <sup>a</sup> | -18.8(4)                  | -31.7(6)                  | -12.9(7)                   |
| $\text{H}_2\text{A}^{2+} + \text{H}_3\text{L}^{9-} \rightarrow [(\text{H}_2\text{A})(\text{H}_3\text{L})]^{7-}$ | 3.7(2)               | -22(1)                    | 37.9(5)                   | 60(1)                      |
| $\text{H}_2\text{A}^{2+} + \text{H}_4\text{L}^{8-} \rightarrow [(\text{H}_2\text{A})(\text{H}_4\text{L})]^{6-}$ | 3.6(1)               | -21.4(6)                  | 27.5(5)                   | 48.9(8)                    |
| $\text{H}_2\text{A}^{2+} + \text{H}_5\text{L}^{7-} \rightarrow [(\text{H}_2\text{A})(\text{H}_5\text{L})]^{5-}$ | 4.5(1)               | -26.7(6)                  | 19.8(5)                   | 46.5(8)                    |

<sup>a</sup> Values in parentheses are standard deviation on the last significant figures

Table S6 Thermodynamic data for the formation of  $\text{InsP}_6$  ( $\text{L}^{12-}$ ) complexes with spermidine (A). 0.10 M  $\text{Me}_4\text{NCl}$ ,  $37.0 \pm 0.1$  °C.

| Equilibrium                                                                                                     | $\log K$            | $\Delta G^\circ$ (kJ/mol) | $\Delta H^\circ$ (kJ/mol) | $T\Delta S^\circ$ (kJ/mol) |
|-----------------------------------------------------------------------------------------------------------------|---------------------|---------------------------|---------------------------|----------------------------|
| $\text{HA}^+ + \text{H}_3\text{L}^{9-} \rightarrow [(\text{HA})(\text{H}_3\text{L})]^{8-}$                      | 2.7(3) <sup>a</sup> | -16(2)                    | b                         | b                          |
| $\text{H}_2\text{A}^{2+} + \text{H}_3\text{L}^{9-} \rightarrow [(\text{H}_2\text{A})(\text{H}_3\text{L})]^{7-}$ | 4.28(4)             | -25.4(2)                  | -18.2(3)                  | 7.2(3)                     |
| $\text{H}_2\text{A}^{2+} + \text{H}_4\text{L}^{8-} \rightarrow [(\text{H}_2\text{A})(\text{H}_4\text{L})]^{6-}$ | 5.04(6)             | -29.9(4)                  | -42.7(3)                  | -12.8(5)                   |
| $\text{H}_3\text{A}^{3+} + \text{H}_4\text{L}^{8-} \rightarrow [(\text{H}_3\text{A})(\text{H}_4\text{L})]^{5-}$ | 4.78(6)             | -28.4(4)                  | 8.4(3)                    | 36.8(5)                    |
| $\text{H}_3\text{A}^{3+} + \text{H}_5\text{L}^{7-} \rightarrow [(\text{H}_3\text{A})(\text{H}_5\text{L})]^{4-}$ | 3.78(9)             | -22.4(5)                  | 5.8(3)                    | 28.2(6)                    |

<sup>a</sup> Values in parentheses are standard deviation on the last significant figures. <sup>b</sup> Not determined.

Table S7 Thermodynamic data for the formation of  $\text{InsP}_6$  ( $\text{L}^{12-}$ ) complexes with spermine (A). 0.10 M  $\text{Me}_4\text{NCl}$ ,  $37.0 \pm 0.1$  °C.

| Equilibrium                                                                                                     | $\log K$             | $\Delta G^\circ$ (kJ/mol) | $\Delta H^\circ$ (kJ/mol) | $T\Delta S^\circ$ (kJ/mol) |
|-----------------------------------------------------------------------------------------------------------------|----------------------|---------------------------|---------------------------|----------------------------|
| $\text{HA}^+ + \text{H}_3\text{L}^{9-} \rightarrow [(\text{HA})(\text{H}_3\text{L})]^{8-}$                      | 4.43(6) <sup>a</sup> | -26.3(4)                  | -15.0(7)                  | 11.3(8)                    |
| $\text{H}_2\text{A}^{2+} + \text{H}_3\text{L}^{9-} \rightarrow [(\text{H}_2\text{A})(\text{H}_3\text{L})]^{7-}$ | 5.30(4)              | -31.5(2)                  | -13.7(7)                  | 17.8(7)                    |
| $\text{H}_2\text{A}^{2+} + \text{H}_4\text{L}^{8-} \rightarrow [(\text{H}_2\text{A})(\text{H}_4\text{L})]^{6-}$ | 6.43(6)              | -38.2(4)                  | -88.2(9)                  | -50(1)                     |
| $\text{H}_3\text{A}^{3+} + \text{H}_4\text{L}^{8-} \rightarrow [(\text{H}_3\text{A})(\text{H}_4\text{L})]^{5-}$ | 7.03(5)              | -41.7(3)                  | -42.8(7)                  | -1.1(8)                    |
| $\text{H}_4\text{A}^{4+} + \text{H}_4\text{L}^{8-} \rightarrow [(\text{H}_4\text{A})(\text{H}_4\text{L})]^{4-}$ | 6.75(6)              | -40.1(4)                  | -5.9(7)                   | 34.2(8)                    |
| $\text{H}_4\text{A}^{4+} + \text{H}_5\text{L}^{7-} \rightarrow [(\text{H}_4\text{A})(\text{H}_5\text{L})]^{3-}$ | 5.42(6)              | -32.2(4)                  | 8.5(7)                    | 40.7(8)                    |
| $\text{H}_4\text{A}^{4+} + \text{H}_6\text{L}^{6-} \rightarrow [(\text{H}_4\text{A})(\text{H}_6\text{L})]^{2-}$ | 3.85(7)              | -22.9(4)                  | -2.0(6)                   | 20.9(7)                    |

<sup>a</sup> Values in parentheses are standard deviation on the last significant figures.

Table S8 Thermodynamic data for the formation of  $\text{InsP}_6$  ( $\text{L}^{12-}$ ) complexes with  $\text{Me}_2$ heptaen (A). 0.10 M  $\text{Me}_4\text{NCl}$ ,  $37.0 \pm 0.1$  °C.

| Equilibrium                                                                                                     | $\log K$            | $\Delta G^\circ$ (kJ/mol) | $\Delta H^\circ$ (kJ/mol) | $T\Delta S^\circ$ (kJ/mol) |
|-----------------------------------------------------------------------------------------------------------------|---------------------|---------------------------|---------------------------|----------------------------|
| $\text{H}_2\text{A}^{2+} + \text{H}_3\text{L}^{9-} \rightarrow [(\text{H}_2\text{A})(\text{H}_3\text{L})]^{7-}$ | 5.0(1) <sup>a</sup> | -29.7(6)                  | -43.5(6)                  | -13.8(8)                   |
| $\text{H}_2\text{A}^{2+} + \text{H}_4\text{L}^{8-} \rightarrow [(\text{H}_2\text{A})(\text{H}_4\text{L})]^{6-}$ | 6.61(6)             | -39.2(4)                  | -76.1(5)                  | -36.9(6)                   |
| $\text{H}_3\text{A}^{3+} + \text{H}_4\text{L}^{8-} \rightarrow [(\text{H}_3\text{A})(\text{H}_4\text{L})]^{5-}$ | 7.38(7)             | -43.8(4)                  | -63.2(5)                  | -19.4(6)                   |
| $\text{H}_4\text{A}^{4+} + \text{H}_4\text{L}^{8-} \rightarrow [(\text{H}_4\text{A})(\text{H}_4\text{L})]^{4-}$ | 6.86(8)             | -40.7(5)                  | -58.1(5)                  | -17.4(7)                   |
| $\text{H}_4\text{A}^{4+} + \text{H}_5\text{L}^{7-} \rightarrow [(\text{H}_4\text{A})(\text{H}_5\text{L})]^{3-}$ | 6.39(8)             | -37.9(5)                  | -64.3(5)                  | -26.4(7)                   |
| $\text{H}_5\text{A}^{5+} + \text{H}_5\text{L}^{7-} \rightarrow [(\text{H}_5\text{A})(\text{H}_5\text{L})]^{2-}$ | 5.1(1)              | -30.3(6)                  | -14.0(4)                  | 16.3(7)                    |
| $\text{H}_5\text{A}^{5+} + \text{H}_6\text{L}^{6-} \rightarrow [(\text{H}_5\text{A})(\text{H}_6\text{L})]^{-}$  | 4.3(1)              | -25.5(6)                  | -44.0(5)                  | -18.5(8)                   |

<sup>a</sup> Values in parentheses are standard deviation on the last significant figures.

Table S9 Thermodynamic data for the formation of  $\text{InsP}_6$  ( $\text{L}^{12-}$ ) complexes with  $\text{Me}_2\text{octaen}$  (A). 0.10 M  $\text{Me}_4\text{NCl}$ ,  $37.0 \pm 0.1$  °C.

| Equilibrium                                                                                                     | $\log K$            | $\Delta G^\circ$ (kJ/mol) | $\Delta H^\circ$ (kJ/mol) | $T\Delta S^\circ$ (kJ/mol) |
|-----------------------------------------------------------------------------------------------------------------|---------------------|---------------------------|---------------------------|----------------------------|
| $\text{H}_2\text{A}^{2+} + \text{H}_3\text{L}^{9-} \rightarrow [(\text{H}_2\text{A})(\text{H}_3\text{L})]^{7-}$ | 5.6(1) <sup>a</sup> | -33.2(6)                  | -22.5(6)                  | 10.7(8)                    |
| $\text{H}_2\text{A}^{2+} + \text{H}_4\text{L}^{8-} \rightarrow [(\text{H}_2\text{A})(\text{H}_4\text{L})]^{6-}$ | 7.12(7)             | -42.3(4)                  | -67.8(5)                  | -25.5(6)                   |
| $\text{H}_3\text{A}^{3+} + \text{H}_4\text{L}^{8-} \rightarrow [(\text{H}_3\text{A})(\text{H}_4\text{L})]^{5-}$ | 8.18(7)             | -48.6(4)                  | -66.9(4)                  | -18.3(6)                   |
| $\text{H}_4\text{A}^{4+} + \text{H}_4\text{L}^{8-} \rightarrow [(\text{H}_4\text{A})(\text{H}_4\text{L})]^{4-}$ | 7.90(7)             | -46.9(4)                  | -56.3(4)                  | -9.4(6)                    |
| $\text{H}_5\text{A}^{5+} + \text{H}_4\text{L}^{8-} \rightarrow [(\text{H}_5\text{A})(\text{H}_4\text{L})]^{3-}$ | 7.15(7)             | -42.4(4)                  | -23.1(5)                  | 19.3(6)                    |
| $\text{H}_5\text{A}^{5+} + \text{H}_5\text{L}^{7-} \rightarrow [(\text{H}_5\text{A})(\text{H}_5\text{L})]^{2-}$ | 5.73(8)             | -34.0(5)                  | -29.8(5)                  | 4.2(7)                     |
| $\text{H}_5\text{A}^{5+} + \text{H}_6\text{L}^{6-} \rightarrow [(\text{H}_5\text{A})(\text{H}_6\text{L})]^{-}$  | 5.06(7)             | -30.0(4)                  | -52.7(4)                  | -22.7(6)                   |

<sup>a</sup> Values in parentheses are standard deviation on the last significant figures.

Table S10 Cumulative  $\Delta H^\circ$  values measured for the formation of  $\text{InsP}_6$  ( $\text{L}^{12-}$ ) complexes with polyamines in 0.10 M  $\text{Me}_4\text{NCl}$  at  $37.0 \pm 0.1$  °C.

|                             | 1 1 4                 | 1 1 5     | 1 1 6     | 1 1 7     | 1 1 8     | 1 1 9     | 1 1 10    | 1 1 11    |
|-----------------------------|-----------------------|-----------|-----------|-----------|-----------|-----------|-----------|-----------|
| put                         | -97.0(5) <sup>a</sup> | -116.3(4) | -96.3(3)  | -110.6(3) |           |           |           |           |
| cad                         | -106.0(5)             | -59.2(4)  | -56.5(4)  | -45.5(4)  |           |           |           |           |
| agm                         | -110.8(5)             | -96.2(5)  | -105.9(4) | -11.8(4)  |           |           |           |           |
| spd                         |                       | -148.6(2) | -172.4(2) | -170.3(2) | -171.1(2) |           |           |           |
| spm                         | -90.4(6)              | -141.3(6) | -215.1(8) | -221.0(6) | -232.7(6) | -216.5(6) | -217.7(5) |           |
| $\text{Me}_2\text{hexaen}$  |                       | -173.5(4) | -174.6(2) | -210.5(2) | -223.8(3) | -227.9(3) | -233.2(3) | -240.6(3) |
| $\text{Me}_2\text{heptaen}$ |                       | -147.8(5) | -179.8(4) | -205.6(4) | -243.3(4) | -247.7(4) | -233.2(3) | -257.9(4) |
| $\text{Me}_2\text{octaen}$  |                       | -134.1(5) | -178.5(4) | -222.3(3) | -259.0(3) | -271.3(4) | 276.1(4)  | -293.6(3) |

<sup>a</sup> Values in parentheses are standard deviation on the last significant figures.

Table S11 Cumulative  $\Delta H^\circ$  values measured for protonation of  $\text{InsP}_6$  ( $\text{L}^{12-}$ ) in 0.10 M  $\text{Me}_4\text{NCl}$  at  $37.0 \pm 0.1$  °C.

|                                | $\Delta H^\circ$ (kJ/mol) |
|--------------------------------|---------------------------|
| $\text{L}^{12-} + \text{H}^+$  | 9.90(8) <sup>a</sup>      |
| $\text{L}^{12-} + 2\text{H}^+$ | -20.23(8)                 |
| $\text{L}^{12-} + 3\text{H}^+$ | -24.35(5)                 |
| $\text{L}^{12-} + 4\text{H}^+$ | -23.68(7)                 |
| $\text{L}^{12-} + 5\text{H}^+$ | -21.88(7)                 |
| $\text{L}^{12-} + 6\text{H}^+$ | -16.53(5)                 |
| $\text{L}^{12-} + 7\text{H}^+$ | -4.1(5)                   |
| $\text{L}^{12-} + 8\text{H}^+$ | 15.4(7)                   |

<sup>a</sup> Values in parentheses are standard deviation on the last significant figures.

Table S12 Cumulative  $\Delta H^\circ$  values measured for protonation of polyamines in 0.10 M  $\text{Me}_4\text{NCl}$  at  $37.0 \pm 0.1$  °C.

|                             | 1 1                    | 1 2        | 1 3        | 1 4        | 1 5        | 1 6        | 1 7        | 1 8       | 1 9       |
|-----------------------------|------------------------|------------|------------|------------|------------|------------|------------|-----------|-----------|
| Put                         | -57.10(5) <sup>a</sup> | -114.91(5) |            |            |            |            |            |           |           |
| Cad                         | -56.53(3)              | -112.63(3) |            |            |            |            |            |           |           |
| Agm                         | -54.73(4)              | -109.77(4) |            |            |            |            |            |           |           |
| Spd                         | -50.88(2)              | -106.02(2) | -155.06(2) |            |            |            |            |           |           |
| Spm                         | -51.06(3)              | -103.21(2) | -154.54(2) | -203.17(2) |            |            |            |           |           |
| 3,3,3-tet                   | -52.4(1)               | -106.8(1)  | -160.8(1)  | -211.1(1)  |            |            |            |           |           |
| $\text{Me}_2\text{hexaen}$  | -36.17(6)              | -79.41(5)  | -121.31(5) | -164.18(5) | -200.30(5) | -231.96(5) | -257.75(6) |           |           |
| $\text{Me}_2\text{heptaen}$ | -36.22(6)              | -79.97(5)  | -118.73(5) | -161.50(5) | -197.33(5) | -225.99(5) | -257.84(6) | -284.1(1) |           |
| $\text{Me}_2\text{octaen}$  | -42.92(6)              | -87.35(5)  | -131.75(4) | -179.10(4) | -224.40(4) | -261.40(5) | -298.53(5) | -331.0(1) | -358.2(1) |

<sup>a</sup> Values in parentheses are standard deviation on the last significant figures.

## References

1 N. Veiga, J. Torres, I. Macho, K. Gomez, G. Gonzalez and C. Kremer, *Dalton Trans.*, 2014, **43**, 16238-16251.
